# Supplementary material for: Ideas and Perspectives: Potentially Large but Highly Uncertain Greenhouse Gas Emissions Resulting from Peat Erosion
Source: Copernicus journal article supplement (doi:10.5194/egusphere-2025-287), 2025-02-28
Supplement: Supplementary file [file egusphere-2025-287-AC1-supplement.pdf]

## Response to Reviewer 1

(Reviewer comments in blue, our response in bold black and quoted text in black italics)

This paper highlights the importance, but also the lack of knowledge around particulate organic carbon erosion from peatlands and the contribution this could make to CO<sub>2</sub> emissions as these degrade. This is an interesting paper which will be of interest to a broad audience.

I am left wondering how the DOC pathway fits into this model of C loss and the relative importance of wasting, DOC and POC for C loss. Some discussion of how these are connected and an acknowledgement that POC is not the only fluvial C export would be helpful.

**We agree that DOC is an important carbon loss pathway from peatlands and have now acknowledged this in the first paragraph as follows:**

*'Peatlands are important sources of fluvial carbon including particulate organic carbon (POC), dissolved organic carbon (DOC) and dissolved gases (Billett et al., 2015; Rosset et al., 2022). Previous studies have suggested that the relative roles of these fluvial forms are typically ~15-40% of CO<sub>2</sub> equivalent net ecosystem exchange (Dinsmore et al., 2010; Roulet et al., 2007; Billett et al., 2010). However, POC flux is particularly high from peatlands where vegetation cover is partial (Evans et al., 2006) and in these systems POC can contribute > 80 % of the fluvial flux (Pawson et al., 2008) while a lack of vegetation will also be associated with a reduced terrestrial C uptake across the peatland and potentially to enhanced direct losses to the atmosphere. Given such large potential contributions to C losses, it is critical that more studies acknowledge the POC pathway in the carbon budget. Previous studies have suggested that both DOC and POC are metabolised to CO<sub>2</sub> in the fluvial system to some degree, with current best estimates between 50 – 90% conversion for POC and 80 -100% for DOC (Evans et al., 2013). However, most studies focus on terrestrial gas fluxes or aquatic DOC fluxes. Hence, the various pathways for POC storage, transport or transformation to CO<sub>2</sub> are not well studied (Palmer et al., 2016).*

L29 I would remove particularly as this makes it seem a UK focused issue which is then contradicted by the paragraph starting l45

**We agree, we have replaced this text with the text above to comment more broadly on carbon losses from peatlands**

L55/56 a reference for the calculation of emissions from POC should be included here

**In response to RC2 on making our paper more generally applicable to all peatlands that are eroding, we included the IPCC 2013 Wetlands supplement equation on emissions from POC**

L121 typo but -> by

## **We will apply this correction**

L158 <https://www.sciencedirect.com/science/article/pii/S0016706117317275> measures mass loss from litter bags in a UK peatland

**We thank the reviewer for this reference and now refer to it, however, we note that this paper was a 60 day lab-based incubation of peat that will not undergo the variable temperature, moisture and physical disturbance that peat would during a multiannual study of decomposition in the field.**

Table 1 – the title is very long and repeats much of the text in paragraph starting line 144, I would suggest putting more detail in the main text and shortening the table caption. If you wish to highlight this calculation, then perhaps convert it into a workflow figure.

## **We have integrated this long figure legend into the text around line 144 as follows:**

*'To evaluate potential direct CO<sub>2</sub> flux to the atmosphere from bare peat surfaces (termed 'wastage' (Evans et al., 2006)), we assumed no subsidence (while acknowledging this may cause overestimates of other losses) and applied emissions factors to SRR data compiled by Li et al. (2018). We calculated a median SRR of 18.9 mm yr<sup>-1</sup> for UK eroding blanket bogs from 22 datasets that contributed to the review by Li et al. (2018) (Table 1). We then applied a best estimate of 35 % wastage rate (Evans et al., 2006), although this could vary between 5% (Pawson, 2008) and 80% (Francis, 1990), and UK average peat bulk density of 0.13 g cm<sup>-3</sup> for peat soils between 30-100 cm and carbon content of 53% (extracted from UK soil Database (Frogbrook et al., 2009)) to estimate CO<sub>2</sub> loss from bare peat surfaces of 16.7 tCO<sub>2</sub> ha<sup>-1</sup> yr<sup>-1</sup>, assuming that all gaseous carbon losses from these exposed surfaces is CO<sub>2</sub> (Table 1).*

*We scaled the CO<sub>2</sub> flux per area bare peat to the catchment scale by assuming 15 % bare peat area combined with 85% of the catchment is 'Modified bog' which covers typical heather-dominated bogs and which currently carries an average CO<sub>2</sub> emission factor of 0.03 t CO<sub>2</sub> ha<sup>-1</sup> yr<sup>-1</sup> (Evans et al., 2022) The assumption of 15 % bare peat in eroding blanket bogs is based on the UK average bare peat cover in these systems (Evans et al., 2017). The composite CO<sub>2</sub> flux for the landscape from our estimate from bare peat (15% at 16.7 tCO<sub>2</sub> ha<sup>-1</sup> yr<sup>-1</sup>) and average net ecosystem exchange estimates for vegetated 'modified bog' (85% at 0.03 tCO<sub>2</sub>e ha<sup>-1</sup> yr<sup>-1</sup>) results in an estimate of 2.5 tCO<sub>2</sub> ha<sup>-1</sup> yr<sup>-1</sup> for the landscape. This represents a potentially large flux of CO<sub>2</sub> from peat bogs to the atmosphere. Although these calculations are based on very limited data, this rough estimate is comparable to a recently published paper where authors measured net ecosystem exchange of 3.6 tCO<sub>2</sub> ha<sup>-1</sup> yr<sup>-1</sup> over an eroding blanket bog with approximately 15 % bare peat cover (Artz et al., 2022). Similarly, a former peat extraction site in Quebec with low vegetation coverage represented a large carbon source of between 5.8 and 8.7 t CO<sub>2</sub> ha<sup>-1</sup> yr<sup>-1</sup> (Rankin et al., 2018), indicating that bare peat could be a large direct source of CO<sub>2</sub>.'*

## **And shortened the table legend to read as follows:**

*'Table 1: Measured Surface retreat rate (SRR) and estimated direct CO<sub>2</sub> and POC losses from bare peat. Catchment scale net ecosystem exchange (NEE) of CO<sub>2</sub> and POC losses for an eroding bog based on an assumption of 15% bare peat cover compared to measured CO<sub>2</sub> NEE*

*(measured by Eddy Covariance (Artz et al., 2022) and POC losses (measured by sediment loss (Li et al., 2018)) at catchment scales.'*

**The details of how POC fluxes are estimated are still outlined in section 3 at Line 190**

Concluding remarks – needs a statement between the two sentences linking POC erosion to CO<sub>2</sub> emissions.

**We agree with the reviewer and have added the text so the sentences are connected as follows:**

*'Depending on the extent of bare peat within a peatland, and the local slope and wind conditions, erosion can be the dominant pathway for carbon loss (Evans et al., 2006). Peat that is lost through erosion has potential to be degraded to CO<sub>2</sub> at various stages on its transit as POC. Due to the complex biophysical processes and interactions that cascade from peat erosion there is very high uncertainty around the emissions that occur as a result.'*

## References:

- Artz, R. R. E., Coyle, M., Donaldson-Selby, G., and Morrison, R.: Net carbon dioxide emissions from an eroding Atlantic blanket bog, *Biogeochemistry*, 159, 233-250, 10.1007/s10533-022-00923-x, 2022.
- Billett, M. F., Garnett, M. H., and Dinsmore, K. J.: Should Aquatic CO<sub>2</sub> Evasion be Included in Contemporary Carbon Budgets for Peatland Ecosystems?, *Ecosystems*, 18, 471-480, 10.1007/s10021-014-9838-5, 2015.
- Billett, M. F., Charman, D. J., Clark, J. M., Evans, C. D., Evans, M. G., Ostle, N. J., Worrall, F., Burden, A., Dinsmore, K. J., Jones, T., McNamara, N. P., Parry, L., Rowson, J. G., and Rose, R.: Carbon balance of UK peatlands: current state of knowledge and future research challenges, *Climate Research*, 45, 13-29, 10.3354/cr00903, 2010.
- Dinsmore, K. J., Billett, M. F., Skiba, U. M., Rees, R. M., Drewer, J., and Helfter, C.: Role of the aquatic pathway in the carbon and greenhouse gas budgets of a peatland catchment, *Global Change Biology*, 16, 2750-2762, 10.1111/j.1365-2486.2009.02119.x, 2010.
- Evans, C., Artz, R., Burden, A., Clilverd, H., Freeman, B., Heinemeyer, A., Lindsay, R., Morrison, R., Potts, J., and Reed, M.: Aligning the peatland code with the UK peatland inventory, 2022.
- Evans, C., Artz, R., Moxley, J., Smyth, M.-A., Taylor, E., Archer, E., Burden, A., Williamson, J., Donnelly, D., and Thomson, A.: Implementation of an emissions inventory for UK peatlands, *Centre for Ecology and Hydrology*, 2017.
- Evans, C., Allott, T., Billett, M., Burden, A., Chapman, P., Dinsmore, K., Evans, M., Freeman, C., Goulsbra, C., Holden, J., Jones, D., Jones, T., Moody, C., Palmer, S., and Worrall, F.: Towards the estimation of CO<sub>2</sub> emissions associated with POC fluxes from drained and eroding peatlands., *Centre for Ecology and Hydrology, Bangor*, 2013.
- Evans, M., Warburton, J., and Yang, J.: Eroding blanket peat catchments: Global and local implications of upland organic sediment budgets, *Geomorphology*, 79, 45-57, 10.1016/j.geomorph.2005.09.015, 2006.
- Francis, I. S.: Blanket Peat Erosion In A Mid-wales Catchment During 2 Drought Years, *Earth Surface Processes and Landforms*, 15, 445-456, 10.1002/esp.3290150507, 1990.
- Frogbrook, Z. L., Bell, J., Bradley, R. I., Evans, C., Lark, R. M., Reynolds, B., Smith, P., and Towers, W.: Quantifying terrestrial carbon stocks: examining the spatial variation in two upland areas in the UK and a comparison to mapped estimates of soil carbon, *Soil Use and Management*, 25, 320-332, <https://doi.org/10.1111/j.1475-2743.2009.00232.x>, 2009.
- Li, C., Grayson, R., Holden, J., and Li, P.: Erosion in peatlands: Recent research progress and future directions, *Earth-Science Reviews*, 185, 870-886, 10.1016/j.earscirev.2018.08.005, 2018.
- Palmer, S. M., Evans, C. D., Chapman, P. J., Burden, A., Jones, T. G., Allott, T. E. H., Evans, M. G., Moody, C. S., Worrall, F., and Holden, J.: Sporadic hotspots for physico-chemical retention of aquatic organic carbon: from peatland headwater source to sea, *Aquatic Sciences*, 78, 491-504, 10.1007/s00027-015-0448-x, 2016.
- Pawson, R.: Assessing the role of particulates in the fluvial organic carbon flux from eroding peatland systems, *Faculty of Humanities, University of Manchester*, 304 pp., 2008.
- Pawson, R. R., Lord, D. R., Evans, M. G., and Allott, T. E. H.: Fluvial organic carbon flux from an eroding peatland catchment, southern Pennines, UK, *Hydrology and Earth System Sciences*, 12, 625-634, 10.5194/hess-12-625-2008, 2008.
- Rankin, T., Strachan, I. B., and Strack, M.: Carbon dioxide and methane exchange at a post-extraction, unrestored peatland, *Ecological Engineering*, 122, 241-251, 2018.
- Rosset, T., Binet, S., Rigal, F., and Gandois, L.: Peatland Dissolved Organic Carbon Export to Surface Waters: Global Significance and Effects of Anthropogenic Disturbance, *Geophysical Research Letters*, 49, e2021GL096616, <https://doi.org/10.1029/2021GL096616>, 2022.

Roulet, N. T., Lafleur, P. M., Richard, P. J. H., Moore, T. R., Humphreys, E. R., and Bubier, J.: Contemporary carbon balance and late Holocene carbon accumulation in a northern peatland, *Global Change Biology*, 13, 397-411, 10.1111/j.1365-2486.2006.01292.x, 2007.
