# Supplementary material for: Ideas and Perspectives: Potentially Large but Highly Uncertain Greenhouse Gas Emissions Resulting from Peat Erosion
Source: Copernicus journal article supplement (doi:10.5194/egusphere-2025-287), 2025-02-28
Supplement: Supplementary file [file egusphere-2025-287-AC2-supplement.pdf]

## Response to Reviewer 2

(Reviewer comments in blue, our response in bold black and quoted text in black italics)

Generally the article is well written and does an effective job of synthesising research in an area of interest in peatland carbon cycling. I find the explanations to be clear and the estimations to be revealing and valid.

The problem for me is that it is unclear if the focus of the article is UK blanket bogs or peatlands globally. I initially read the introduction as being partly a call for more POC-erosion emission research internationally to match that in the UK. However, by the end of the article I was left unsure if the authors were interested outside of a blanket bog setting. I understand it is necessary to draw mostly on research from the UK where this has been a greater focus. Yet if a global outlook is part of the purpose of this article then some attempt needs to be made to relate those findings to other peatland types found globally, and this needs to be done consistently throughout the article not just acknowledged somewhere. The non-UK erosion examples provided are interesting but I would appreciate more conjecture from the authors on the prevalence, type and importance of erosion and POC transport for emissions in different biomes relating to their typical peatland types and topography.

**This is a very important point. Our aim was to think about peatland erosion and POC more broadly but we agree that the focus on processing of POC in the latter half of the paper gives a impression that this is a UK-only phenomenon. We have rectified this issue by outlining the IPCC 2013 Wetlands supplement equation that was designed to be applicable in any eroding peatland and that the large sources of uncertainty are the flux of POC from bare peat and the conversion factor of POC to CO<sub>2</sub> in more generic terms as follows:**

*'The 2013 IPCC wetlands supplement (Ipcc, 2014) present a general calculation for a POC emissions factor ( $EF_{POC}$ ) for all peatlands and drained organic soils. This generic model, although primarily based on evidence from the UK, was designed for any peatland soil that had suffered significant disturbance that lead to bare peat, including drainage, burning, peat extraction and conversion to arable land as follows (Ipcc, 2014):*

$$EF_{POC} = POC_{FLUX\ BAREPEAT} \times PEAT_{BARE} \times Frac_{POC-CO_2}$$

*Where:  $POC_{FLUX\ BAREPEAT}$  is the POC flux per area of bare peat surface,  $PEAT_{BARE}$  is the area of bare peat and  $Frac_{POC-CO_2}$  is the conversion of POC to CO<sub>2</sub> following export from the peatland.*

*Mapping of bare peat extent at high resolution is progressing (Macfarlane et al., 2024) but the underpinning data for estimating emissions associated with bare peat are highly uncertain (Evans et al., 2013) as the flux depends on specific fluvial mixing events in time and space (Palmer et al., 2016). We argue that this calculation has two major sources of uncertainty which are critical to resolve to confidently quantify emissions that arise from peat erosion. Firstly, the flux of POC from bare peat at the source is only one part of peat volume loss - quantification of the relative contribution of direct CO<sub>2</sub> loss, subsidence and erosion to surface retreat rates will give rise to better quantification POC loss via erosion. Eroded peat will potentially be processed and mineralised in multiple environments, from headwater streams, floodplains to rivers and the*

ocean (Evans et al., 2013; Zhou et al., 2021). Therefore, the second source of uncertainty is the fraction of eroded peat/POC that is converted to CO<sub>2</sub>. This can be addressed by considering the environments and organisms that interact with it while in transit over various timescales.'

**We also now include the following text at line 37 to acknowledge that the majority of peat erosion work has been carried out in the UK, to point out other regions where peat erosion is significant and that all areas will likely suffer worse erosion as climate change continues to impact extreme weather patterns:**

*'In the past century, most of the peat erosion and post-erosion POC research has been conducted in the UK. However, peat erosion is a pressing or emerging problem for peatland systems around the world, with potential for massive carbon losses and climate feedbacks (Fig.1). Potential erosion hotspots are occurring in different environmental and management contexts around the world from drained forestry sites which may have relatively low areas of exposed peat (Marttila and Klove, 2010) to industrial extraction sites with almost complete bare peat cover (Campbell et al., 2002). At the extreme end of erosion, collapse of inland permafrost systems in the arctic and boreal regions (Swindles et al., 2015) can cause localised rapid erosion and movement of soil carbon via thaw slumps (Lamoureux et al., 2014; Pizano et al., 2014), with potential for high emissions as the mobilised carbon becomes available to decomposer organisms in freshwater environments (Li et al., 2024). In contrast, arctic permafrost coastal erosion and coastal-adjacent thaw slumps, which are occurring at an alarming rate in response to rapid warming around the Arctic Ocean, are depositing carbon directly into the ocean (Lantuit and Pollard, 2008; Lantuit et al., 2012). Equally, In the tropics of Asia, coastal erosion of peatlands is causing large direct fluxes of peat to the ocean (Kagawa et al., 2024), but there are also examples of inland peat erosion in Asia which will generate POC that is primary processed in terrestrial systems (Wang et al., 2019).*

*Peat erosion is clearly progressing in a variety of contexts and at different rates, but in every case it will be exacerbated by climate change and associated extreme weather events (Zhao et al., 2024). This is why IPCC reporting of emissions needs to move towards a more nuanced understanding of POC turnover than the broad downstream POC-CO<sub>2</sub> conversion rate of 70% (based on UK examples (Ipcc, 2014)). Depending on the context, biome and global location, estimated emissions resulting from peat erosion could vary significantly from currently reported rates.'*

**Furthermore, we have edited figure 3 to be more generic and applicable to any peatland erosion scenario because we appreciate the previous version was too specific to erosion of UK blanket bogs:**

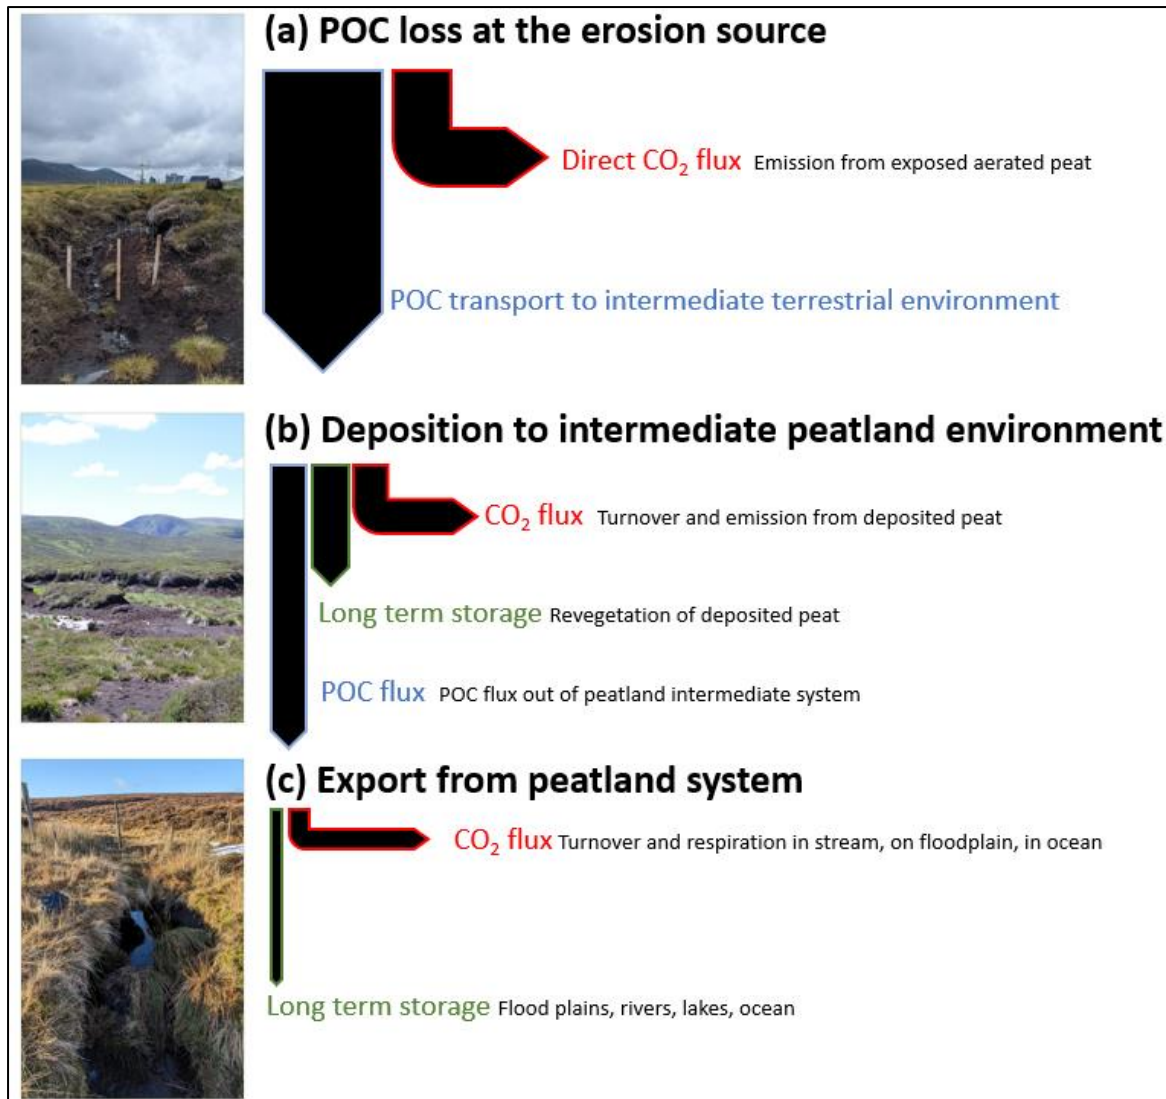

We have also added the sentence below to the concluding paragraph to make the point that climate change threatens increased erosion rates for all peatlands:

*‘Climate change is driving increasingly severe erosive forces across all peatlands, from increased storminess to decreasing permafrost stability. Therefore emissions arising from peat erosion are likely to have an increasingly important role in the carbon balance of all peatlands.’*

In a similar fashion, the title uses “greenhouse gas emissions” but a text search finds exactly one mention of  $\text{CH}_4$  in parenthesis and none of  $\text{N}_2\text{O}$ , as such I suggest the title is changed to  $\text{CO}_2$ .

We agree that the processes we outline are relevant to  $\text{CO}_2$  fluxes. We have edited mentioned references to ‘greenhouse gas emissions’ to ‘ $\text{CO}_2$  emissions’ or ‘fluxes’ where appropriate. We also propose editing the title to ‘Carbon Dioxide Emissions’ to more precisely encapsulate the issues we discuss.

On reviewing the emissions factors associated with different peatland conditions and the compound CO<sub>2</sub> emissions from bare peat and vegetated ‘modified bog’ we noticed an error where we had listed emissions as 2.51 t CO<sub>2</sub>e ha<sup>-1</sup> yr<sup>-1</sup>. In reality this figure is for all carbon loss pathways, including DOC and CH<sub>4</sub> (Evans et al. 2022). We now use 0.03 tCO<sub>2</sub> ha<sup>-1</sup> yr<sup>-1</sup> for the CO<sub>2</sub> component of emissions from modified bog which reduces our estimate of 4.6 t CO<sub>2</sub> ha<sup>-1</sup> yr<sup>-1</sup> to 2.5 t CO<sub>2</sub> ha<sup>-1</sup> yr<sup>-1</sup> but the point still stands that our estimate is similar to measured rates (3.6t CO<sub>2</sub> ha<sup>-1</sup> yr<sup>-1</sup> by eddy covariance (Artz et al. 2022) (see the text in response to RC1 for the full context and calculations).

I also think more discussion is needed on the role of human land use pressures in influencing peatland erosion. I have understood this may be relevant in UK blanket bog erosion. It is certainly relevant for peatland systems that do not naturally exhibit significant erosion.

**We have added text to the second paragraph (line 37) that reads as follows:**

*‘The onset of peatland erosion can be traced back over a thousand years (Evans and Warburton, 2011). It is hypothesised that there is a ‘threshold process’ whereby the peat changes from a stable, intact state to an unstable, erosional state. Some propose that erosion is a natural termination after thousands of years of peat accumulation resulting in instability of the peat mass (Conway, 1954; Pearsall, 1956; Colhoun et al., 1965). Others argue that much of the erosion has resulted from anthropogenic pressures, including burning (Yallop et al., 2009), overgrazing (Wilson et al., 1993), artificial drainage installation (Worrall and Evans, 2009; Holden et al., 2007), and atmospheric pollution (Yeloff et al., 2006).*

In conclusion, there is a mismatch between the articles implied focus and it’s actual focus, as such one or the other needs to be altered. I suggest the authors attempt to relate the different aspects of emissions from peatland erosion discussed to other peatland types and settings internationally throughout the article. Or, if I have misunderstood and the article was always supposed to be blanket bog focussed, then I suggest that they edit the abstract, introduction and title to make this clearer.

**We agree with the sentiment of the comment. As detailed above we have edited the language and figures and included detailed references to the IPCC guidance on CO<sub>2</sub> emissions from POC loss to be more generically applicable to all eroding peatlands. While much of the work on the subject of POC processing post initial erosion has been conducted in the UK, we now refer to Li et al. (2024) on remote sensing of retrogressive thaw slumps in permafrost regions both in highlighting progress in monitoring (Line 66) and with regards to early thoughts on post-erosion carbon cycling (Line 186). However, as noted by the reviewers, we are trying to strike a balance between the volume of understanding that has been generated in the UK and the general applicability of these ideas to other eroding peat systems.**

Line 85 “maybe” should be “may be”

**We will apply this change**

## References

- Campbell, D. R., Lavoie, C., and Rochefort, L.: Wind erosion and surface stability in abandoned milled peatlands, *Canadian Journal of Soil Science*, 82, 85-95, 10.4141/S00-089, 2002.
- Colhoun, E., Common, R., and Cruikshank, M.: Recent bog flows and debris slides in the north of Ireland, *Scientific Proceedings of the Royal Dublin Society*, Dublin 1965.
- Conway, V. M.: Stratigraphy and pollen analysis of Southern Pennine blanket peats, *The Journal of Ecology*, 42, 117-147, 1954.
- Evans, C., Allott, T., Billett, M., Burden, A., Chapman, P., Dinsmore, K., Evans, M., Freeman, C., Goulsbra, C., Holden, J., Jones, D., Jones, T., Moody, C., Palmer, S., and Worrall, F.: Towards the estimation of CO<sub>2</sub> emissions associated with POC fluxes from drained and eroding peatlands., Centre for Ecology and Hydrology, Bangor, 2013.
- Evans, M. and Warburton, J.: *Geomorphology of upland peat: erosion, form and landscape change*, John Wiley & Sons, Chichester, England 2011.
- Holden, J., Gascoign, M., and Bosanko, N. R.: Erosion and natural revegetation associated with surface land drains in upland peatlands, *Earth Surface Processes and Landforms*, 32, 1547-1557, <https://doi.org/10.1002/esp.1476>, 2007.
- IPCC: 2013 Supplement to the 2006 IPCC Guidelines for National Greenhouse Gas Inventories: Wetlands, IPCC, Switzerland, 2014.
- Kagawa, H., Yamamoto, K., Sutikno, S., Haidar, M., Basir, N., Koyama, A., Kanno, A., Akamatsu, Y., and Suzuki, M.: Estimation of particulate organic carbon export to the ocean from lateral degradations of tropical peatland coasts, *EGUsphere*, 2024, 1-34, 2024.
- Lamoureux, S. F., Lafrenière, M. J., and Favaro, E. A.: Erosion dynamics following localized permafrost slope disturbances, *Geophysical Research Letters*, 41, 5499-5505, <https://doi.org/10.1002/2014GL060677>, 2014.
- Lantuit, H. and Pollard, W. H.: Fifty years of coastal erosion and retrogressive thaw slump activity on Herschel Island, southern Beaufort Sea, Yukon Territory, Canada, *Geomorphology*, 95, 84-102, <https://doi.org/10.1016/j.geomorph.2006.07.040>, 2008.
- Lantuit, H., Overduin, P. P., Couture, N., Wetterich, S., Aré, F., Atkinson, D., Brown, J., Cherkashov, G., Drozdov, D., Forbes, D. L., Graves-Gaylord, A., Grigoriev, M., Hubberten, H.-W., Jordan, J., Jorgenson, T., Ødegård, R. S., Ogorodov, S., Pollard, W. H., Rachold, V., Sedenko, S., Solomon, S., Steenhuisen, F., Streletskaia, I., and Vasiliev, A.: The Arctic Coastal Dynamics Database: A New Classification Scheme and Statistics on Arctic Permafrost Coastlines, *Estuaries and Coasts*, 35, 383-400, 10.1007/s12237-010-9362-6, 2012.
- Li, Y., Liu, Y., Chen, J., Dang, H., Zhang, S., Mei, Q., Zhao, J., Wang, J., Dong, T., and Zhao, Y.: Advances in retrogressive thaw slump research in permafrost regions, *Permafrost and Periglacial Processes*, 35, 125-142, <https://doi.org/10.1002/ppp.2218>, 2024.
- Macfarlane, F., Robb, C., Coull, M., McKeen, M., Wardell-Johnson, D., Miller, D., Parker, T. C., Artz, R. R. E., Matthews, K., and Aitkenhead, M. J.: A deep learning approach for high-resolution mapping of Scottish peatland degradation, *European Journal of Soil Science*, 75, e13538, <https://doi.org/10.1111/ejss.13538>, 2024.
- Marttila, H. and Klove, B.: Dynamics of erosion and suspended sediment transport from drained peatland forestry, *Journal of Hydrology*, 388, 414-425, 10.1016/j.jhydrol.2010.05.026, 2010.
- Palmer, S. M., Evans, C. D., Chapman, P. J., Burden, A., Jones, T. G., Allott, T. E. H., Evans, M. G., Moody, C. S., Worrall, F., and Holden, J.: Sporadic hotspots for physico-chemical retention of aquatic organic carbon: from peatland headwater source to sea, *Aquatic Sciences*, 78, 491-504, 10.1007/s00027-015-0448-x, 2016.
- Pearsall, W.: Two blanket-bogs in Sutherland, *Journal of Ecology*, 44, 493-516, 1956.
- Pizano, C., Barón, A. F., Schuur, E. A. G., Crummer, K. G., and Mack, M. C.: Effects of thermo-erosional disturbance on surface soil carbon and nitrogen dynamics in upland arctic tundra, *Environmental Research Letters*, 9, 075006, 10.1088/1748-9326/9/7/075006, 2014.

Swindles, G. T., Morris, P. J., Mullan, D., Watson, E. J., Turner, T. E., Roland, T. P., Amesbury, M. J., Kokfelt, U., Schoning, K., Pratte, S., Gallego-Sala, A., Charman, D. J., Sanderson, N., Garneau, M., Carrivick, J. L., Woulds, C., Holden, J., Parry, L., and Galloway, J. M.: The long-term fate of permafrost peatlands under rapid climate warming, *Scientific Reports*, 5, 17951, 10.1038/srep17951, 2015.

Wang, D., Li, Z., Li, Z., and You, Y.: Organic Carbon Flux in Ditches during the Growing Season in a Drained Alpine Peatland, *Ecohydrology*, 12, e2161, <https://doi.org/10.1002/eco.2161>, 2019.

Wilson, P., Clark, R., McAdam, J. H., and Cooper, E. A.: Soil erosion in the Falkland Islands: an assessment, *Applied Geography*, 13, 329-352, [https://doi.org/10.1016/0143-6228\(93\)90036-Z](https://doi.org/10.1016/0143-6228(93)90036-Z), 1993.

Worrall, F. and Evans, M.: The carbon budget of upland peat soils, in: *Drivers of environmental change in uplands*, edited by: Bonn, A., Allott, T., Hubacek, K., and Stewart, J., Routledge, Oxon, 448-474, 2009.

Yallop, A., Clutterbuck, B., and Thacker, J.: The history and ecology of managed fires in the uplands, in: *Drivers of Environmental Change in Uplands*, edited by: Bonn, A., Allot, T., Hubacek, K., and Stewart, J., Routledge, Oxon, 2009.

Yeloff, D., Labadz, J., and Hunt, C.: Causes of degradation and erosion of a blanket mire in the southern Pennines, UK, *Mires and Peat*, 104, 2006.

Zhao, Y., Zhu, D., Wu, Z., and Cao, Z.: Extreme rainfall erosivity: Research advances and future perspectives, *Science of The Total Environment*, 917, 170425, <https://doi.org/10.1016/j.scitotenv.2024.170425>, 2024.

Zhou, Y., Evans, C. D., Chen, Y., Chang, K. Y., and Martin, P.: Extensive remineralization of peatland-derived dissolved organic carbon and ocean acidification in the Sunda Shelf Sea, Southeast Asia, *Journal of Geophysical Research: Oceans*, 126, e2021JC017292, 2021.
